# Supplementary material for: The neuropsychological profile of professional action video game players
Source: PeerJ. 2020 Nov 17;8:e10211. doi: 10.7717/peerj.10211 (PMC7678459; doi:10.7717/peerj.10211)
Supplement: Supplemental Information 1 [file peerj-08-10211-s001.xlsx]

## Sheet: rID
Group	SubjID	MOTID	Inclusion	nMOTsessions	Age	Gender	Handedness	Age_StartVGP	WeeklyVGP_now	BDI
Professional	PVGP1	AM01	Included	5	21.3333	Male	Right	5	55	1
Professional	PVGP2	AM02	Included	5	21.1667	Male	Right	7	40	0
Professional	PVGP3	AM03	Included	5	23.9167	Male	Right	7	60	6
Professional	PVGP4	AM04	Included	5	23.9167	Male	Right	5	35	10
Professional	PVGP5	AM05	Included	5	18.25	Male	Right	13	30	#N/A
Professional	PVGP6	PR01	Included	5	25	Male	right	3	60	5
Professional	PVGP7	PR02	Included	5	24	Male	right	9	90	19
Professional	PVGP8	PR03	Included	5	23.1667	Male	right	6	70	4
Professional	PVGP9	PR04	Included	5	28	Male	right	12	35	13
Professional	PVGP10	PR05	Included	5	24.25	Male	right	8	51	6
Professional	PVGP11	PR06	Included	5	21.9167	Male	right	7	55	3
Professional	PVGP12	PR07	Included	5	25.8333	Male	right	5	70	3
Professional	PVGP13	PR08	Included	5	24.1667	Male	right	5	70	10
Professional	PVGP14	PR09	Included	5	26.3333	Male	right	5	60	9
Amateur	CVGP1	DB01	Included	5	26.4167	Male	Left	5	15	1
Amateur	CVGP2	DB02	Included	5	25.4167	Female	Left	14	7	3
Amateur	CVGP3	DB03	Included	5	28.4167	Male	Right	5	8	3
Amateur	CVGP4	DB04	Excluded - >20h / AVG per week	5	24.75	Male	right			12
Amateur	CVGP5	DB05	Included	5	25.3333	Female	right	8	6	6
Amateur	CVGP6	DB06	Included	5	26.0833	Male	Right	5	7.5	12
Amateur	CVGP7	DB07	Included	5	23.5	Female	right	6	12.5	14
Amateur	CVGP8	DB08	Included	5	29.8333	Female	right	6	12.5	3
Amateur	CVGP9	DB09	Excluded - poor testing conditions at home	1	27.25	Male	Right			7
Amateur	CVGP10	DB10	Included	5	26.4167	Male	Right	8	5	0
Amateur	CVGP11	DB11	Excluded - plays competive VG & >20h/week	0	24	Male	Right			5
Amateur	CVGP12	DB12	Included	5	26.0833	Male	right	6	8	3
Amateur	CVGP13	DB13	Included	5	27	Male	right	6	10	#N/A
Amateur	CVGP14	DB14	Included	5	26.75	Male	right	5	6	1
Amateur	CVGP15	DB15	Included	5	31.1667	Male	right	9	15	0
Amateur	CVGP16	DB16	Excluded - poor testing conditions at home	1	28	Male				#N/A
Amateur	CVGP17	DB17	Included	5	26.75	Male	right	7	10	4
Amateur	CVGP18	DB18	Included	0	18.3333	Male	right	3	15	3
Amateur	CVGP19	DB19	Included	0	18.4167	Male	right	10	7.5	12
Amateur	CVGP20	DB20	Included	0	19.0833	Male	Left	5	6.5	9

## Sheet: rNPSY
SubjID	Group	Coding	Stroop_CN	Stroop_WR	Stroop_Inh	Stroop_Flex	Stroop_InhErr	Stroop_FlexErr	VisPuzzles	Tower_Total	Tower_Ratio	DigitSpan_Total	DigitSpan_FW	DigitSpan_BW	DigitSpan_Seq	SpatSpan_Total	SpatSpan_FW	SpatSpan_BW	D2_TN	D2_PE	D2_NC	D2_CP	D2_FR	GroPeg_DH	GroPeg_NDH
PVGP1	Professional	87	26	18	51	48	1	2	9	21	1.28	36	14	12	10	19	10	9	588	11.56	520	192	18	96.5	115
PVGP2	Professional	78	20	16	40	57	2	3	18	17	1.95	37	15	12	10	23	13	10	479	10	431	147	13	68	77
PVGP3	Professional	92							19	18	1.43					28	14	14	541	1.11	535	221	7	72.5	66.5
PVGP4	Professional	94	20	15	36	43	0	2	17	15	1.68	41	14	14	13	27	14	13	614	4.88	584	239	8	73	74
PVGP5	Professional	77							20							22	14	8	480	2.5	468	186	11	88	77
PVGP6	Professional	61	22	16	39	46	0	0	22	23	1.47	28	10	8	10	20	11	9	502	3.59	484	189	11	70	58
PVGP7	Professional	65	28	19	46	48	1	3	13	19	1.36	26	10	7	9	20	12	8	511	2.74	497	185	14	58.94	62.5
PVGP8	Professional	54	32	19	51	51	1	1	20	21	1.72	23	8	7	8	23	13	10	495	3.23	479	188	13	70	77
PVGP9	Professional	92	21	16	38	49	0	1	22	16	1.8	33	11	11	11	23	12	11	640	6.09	601	251	7	59.33	66.08
PVGP10	Professional	80	29	18	52	63	2	0	17	18	1.61	32	10	10	12	25	13	12	603	4.48	576	243	10	59.5	70
PVGP11	Professional	73	26	20	44	44	1	0	24	28	1.04	41	16	15	10	27	13	14	504	3.37	487	189	11	61.5	60
PVGP12	Professional	82	27	18	45	52	0	0	21	27	1.04	32	11	8	13	23	13	10	553	3.07	536	215	10	56.5	64
PVGP13	Professional	83	22	18	44	51	1	0	20	24	1.25	33	11	8	14	19	9	10	619	3.23	599	258	7	71	66.5
PVGP14	Professional	67	21	16	38	65	0	4	17	15	1.8	31	10	11	10	23	13	10	519	1.9	509	220	14	71.5	68.55
CVGP1	Amateur	72	31	20	49	50	1	3	13	24	1.19	25	8	7	10	22	12	10	579	10.01	521	197	12	68	65.75
CVGP2	Amateur	85	29	19	57	51	1	0	17	15	1.89	29	11	10	8	17	8	9	571	0.5	568	249	8	66.35	58.67
CVGP3	Amateur	75	22	17	36	51	0	0	23	14	2.02	38	16	12	10	21	11	10	429	0.7	426	191	14	53.5	72
CVGP5	Amateur	57	21	16	43	46	1	1	22	23	1.21	34	11	10	13	21	12	9	514	1.16	508	212	13	54.5	65.63
CVGP6	Amateur	63	31	21	54	67	1	1	20	19	1.29	20	6	6	8	20	11	9	502	7.57	464	169	20	55.88	65.89
CVGP7	Amateur	75	24	19	47	51	0	1	18	17	1.45	21	7	5	9	17	10	7	390	2.3	381	155	13	55.63	55.57
CVGP8	Amateur	70	29	20	62	45	3	0	21	14	2.44	22	9	6	7	16	9	7	479	4.38	458	176	17	66	61.85
CVGP10	Amateur	81	21	15	35	45	1	2	16	15	2.26	34	12	12	10	16	6	10	549	2	538	227	10	63.07	64.7
CVGP12	Amateur	55	28	23	41	51	0	0	23	22	1.34	34	12	11	11	19	9	10	433	0.92	429	176	9	65.55	63.88
CVGP13	Amateur	69	23	18	42	57	5	2	22	26	1.4	32	12	8	12	23	11	12	617	3.24	597	253	10	55.64	54
CVGP14	Amateur	73	26	21	40	51	1	3	23	21	1.98	27	8	9	10	23	13	10	514	2.92	499	201	14	61.87	64.67
CVGP15	Amateur	83	33	21	47	50	0	1	18	24	1.39	28	9	9	10	18	10	8	455	4.17	435	170	12	55.65	60.28
CVGP17	Amateur	78	27	21	41	61	3	2	17	12	5.25	24	9	7	8	21	11	10	436	1.83	428	187	17	65.89	68.63
CVGP18	Amateur	75	26	24	45	52	1	1	22	16	1.76	28	9	9	10	22	10	12	492	4.29	471	196	20	66.96	69.54
CVGP19	Amateur	47	27	18	45	55	4	2	20	17	3.37	29	10	9	10	19	10	9	429	3.5	414	173	12	96.98	97.02
CVGP20	Amateur	78	30	27	51	53	2	1	17	16	1.76	27	7	9	11	17	10	7	508	9.06	462	178	19	74.12	69.78

## Sheet: ID
Group	SubjID	SubjID2	Inclusion	Exclusion notes	nMOTsessions	Age	First Language	Other Languages	Nationality	Assessment language	First assessement	Gender	Handedness	Age_StartVGP	Hours/week of gaming (NOW)	Hours/week of gaming (PEAK)	WeeklyVGP_now	Game #1	Ranking (game#1)	Session per week (game#1)	Time per session (game #1)	Device (game #1)	Game #2	Ranking (game #2)	Session per week (game #2)	Time per session (game #2)	Device (game #2)	Game #3	Ranking (game #3)	Session per week (game #3)	Time per session (game #3)	Device (game #3)
Professional	PVGP1	AM01	Included		5	21.3333	Anglais	N/A	Américaine	anglais	2018-06-12	Male	Right	5	50-60	50-60	55	Overwatch	Top 500 / Pro	6	6 à 10 h	PC	League of Legend	Diamond	4	5	PC	CS: GO	LE	1	4	PC
Professional	PVGP2	AM02	Included		5	21.1667	Anglais	N/A	Américaine	anglais	2018-06-12	Male	Right	7	< 40	< 40	40	Overwatch	GrandMaster
Professional	PVGP3	AM03	Included		5	23.9167	Coréen	Anglais	Corée du sud	anglais	2018-06-13	Male	Right	7	60	60	60	Overwatch	GrandMaster	2 à 3	2 à 3h	PC	Heart Stone	N/A	1	8 à 10h	PC
Professional	PVGP4	AM04	Included		5	23.9167	Anglais	N/A	Américaine	anglais	2018-06-13	Male	Right	5	20-50	20-50	35	Overwatch	GrandMaster	2 à 5	2 à 3h	PC	Heart Stone	4 - Legand	2 à 5	2 à 3	PC	Realm Royal	Gold	2 à 3h / session
Professional	PVGP5	AM05	Included		5	18.25	Coréen	Anglais	Corée du sud	anglais	2018-06-13	Male	Right	13	30	30	30	Overwatch	GrandMaster
Professional	PVGP6	PR01	Included		5	25	Anglais	N/A	Américaine	anglais	2018-07-02	Male	right	3	60	60	60	Overwatch	GrandMaster	7 à 10	5	PC	World of Warcraft	N/A
Professional	PVGP7	PR02	Included		5	24	Anglais	N/A	Américaine	anglais	2018-07-02	Male	right	9	90	90	90	Overwatch	GrandMaster	10	13	PC	World of Warcraft	N/A	1 à 2	1 à 2	PC	Hearth Stone
Professional	PVGP8	PR03	Included		5	23.1667	Français	Anglais	Belge	francais	2018-07-02	Male	right	6	65-75	90	70	Overwatch	Top 500 / Pro	30	4	PC	Realm Royal	Diamond	4	2	PC	OSU	NA	2	1	PC
Professional	PVGP9	PR04	Included		5	28	Anglais	N/A	Américaine	anglais	03-07-2018	Male	right	12	30 à 40	30-40	35	overwatch	Top 500 / Pro	3	4 à 6	PC	Destiny 2	N/A	2 à 4	6	PC	Hearth Stone	Tier 2	2	2	PC
Professional	PVGP10	PR05	Included		5	24.25	Fin	Anglais	Finlandais	anglais	03-07-2018	Male	right	8	42 à 60	42-60	51	Overwatch	Top 500 / Pro	6	7	PC	Path of Exil	N/A	3	4	PC	Dota2	5000	1	2	PC
Professional	PVGP11	PR06	Included		5	21.9167	Anglais	N/A	Américaine	anglais	05-07-2018	Male	right	7	55	55	55	Overwatch	Top 500 / Pro	10	4	PC
Professional	PVGP12	PR07	Included		5	25.8333	Anglais	N/A	Canadienne	anglais	05-07-2018	Male	right	5	70	70	70	Overwatch	Top 500 / Pro	18	2.5	PC	Starcraft	N/A	4	1	PC	Dota2
Professional	PVGP13	PR08	Included		5	24.1667	Anglais	N/A	Américaine	anglais	06-07-2018	Male	right	5	70	70	70	Overwatch	Top 500 / Pro	6	4 à 6	PC	Wizard of Legend	N/A	2	2 à 3	PC
Professional	PVGP14	PR09	Included		5	26.3333	Anglais	N/A	Américaine	anglais	07-07-2018	Male	right	5	60	60	60	Overwatch	top 500 / Pro	10	4	PC	Fortuite	N/A	5	4	PC	Super Smash		3	2	Game cube
Amateur	CVGP1	DB01	Included		5	26.4167	Français	Anglais	Canadienne	Francais	15-07-2018	Male	Left	5	15	20	15	Counter-Strike: Global Offensive	Silver	2	2	PC	Dota2	N/A	5	2	PC	PUBG		5	2	PC
Amateur	CVGP2	DB02	Included		5	25.4167	Français	Anglais	Canadienne	Francais	16-07-2018	Female	Left	14	7	20	7	Counter-Strike: Global Offensive	Silver	5	2	PC	Uncharted	Gold	5	2	PS4	Tombrider	4	3	PC
Amateur	CVGP3	DB03	Included		5	28.4167	Français	Anglais	Canadienne	Francais	22-07-2018	Male	Right	5	8	20	8	PubG		1	2	PC	Persona	N/A	1	4	PS4
Amateur	CVGP4	DB04	Excluded	- >20h / AVG per week	5	24.75	Français	Anglais	Canadienne	Francais	23-07-2018	Male	right		45	45		Counter-Strike: Global Offensive	Silver Elite	2 à 3	3	PC	Overgatch	Diamond	3	4	PC	Rainbow 6		1 à 2	6	PC	AUTRE : Final Fantasy, Paladins, Heros of the storm
Amateur	CVGP5	DB05	Included		5	25.3333	Français	Anglais	Canadienne	Francais	07-08-2018	Female	right	8	6	20	6	Overwatch		1à2	2à5	PC	LEague of Legend	N/A	5	4	PC	GTA	NA	5	4	Xbox
Amateur	CVGP6	DB06	Included		5	26.0833	Français	Anglais	Canadienne	Francais	10-08-2018	Male	Right	5	5 à 10	40-50	7.5	Counter-Strike: Global Offensive	Silver Elite	2 à 3	3 à 4	PC	League of Legend		1	4 à 5	PC
Amateur	CVGP7	DB07	Included		5	23.5	Français	Anglais	Canadienne	Francais	16-08-2018	Female	right	6	10 à 15	16-24	12.5	Counter-Strike: Global Offensive	Silver	1	4	PC	Pub G	NA	2 à 3	6	PC	7 days to die	110	1 à 2	8h	PC
Amateur	CVGP8	DB08	Included		5	29.8333	Français	Anglais	Canadienne	Francais	16-08-2018	Female	right	6	10 à 15	16-24	12.5	Counter-Strike: Global Offensive	Silver	1	4	PC	Pub G	NA	2 à 3	6	PC	7 days to die	110	1 à 2	8h	PC
Amateur	CVGP9	DB09	Excluded	poor testing conditions at home	1	27.25	Français	Anglais	Canadienne	Francais	21-08-2018	Male	Right		20	20		Counter-Strike: Global Offensive		5	4	PC	Fortuite	N/A	2	1	PC
Amateur	CVGP10	DB10	Included		5	26.4167	Français	Anglais	Canadienne	Francais	22-08-2018	Male	Right	8	5	20-25	5	Battle Field2	N/A	2 à 5	3	Xbox 1	Halo 5	Platine	1 à 3	2	Xbox 1	Witcher 3	NA	1 à 2	3	Xbox
Amateur	CVGP11	DB11	Excluded	plays competive VG & >20h/week	0	24	Français	Anglais	Canadienne	Francais	22-08-2018	Male	Right		40-50	40-50		Fortnite	Top 1%	7	5	PC	League of Legend	Top 0,01	7	5	PC	World of Warcraft	NA	5	2	PC
Amateur	CVGP12	DB12	Included		5	26.0833	Français	Anglais	Canadienne	Francais	28-08-2018	Male	right	6	8	12	8	Battle Field4		2	3	Xbox 1	Call of Duty		1	2	Xbox 1	NHL		3	2	Xbox
Amateur	CVGP13	DB13	Included		5	27	français	anglais	Canadienne	Francais	28-08-2018	Male	right	6	10	30	10	Rainbow 6	Gold 2	3	3	Xbox	League of Legend	Bronze
Amateur	CVGP14	DB14	Included		5	26.75	Français	Anglais	Canadienne	Francais	04-09-2018	Male	right	5	4 à 8	10 à 11	6	Call of duty	Silver	2	1	Xbox	Battlefiled	N/A	2	1	Xbox
Amateur	CVGP15	DB15	Included		5	31.1667	Français	Anglais	Canadienne	Francais	17-09-2018	Male	right	9	15	15	15	Call of duty	Silver	3	1.5	PS4	Overgatch	2040	3	1.5	PC
Amateur	CVGP16	DB16	Excluded	poor testing conditions at home	1	28
Amateur	CVGP17	DB17	Included		5	26.75	Français	Anglais	Canadienne	Francais	17-09-2018	Male	right	7	10	10	10	Call of duty	Silver	3	2	Xbox	Battlefield	N/A	3	1	Xbox
Amateur	CVGP18	DB18	Included	Neuropsy only (travel restrictions)	0	18.3333	Français	Anglais	Canadienne	Francais	28-09-2018	Male	right	3	15	20	15	Over Watch		4	2	PS4	Spider man		3	3	PS4	Rocket Leagut		2	1	PS4
Amateur	CVGP19	DB19	Included	Neuropsy only (travel restrictions)	0	18.4167	Français	Anglais	Canadienne	Francais	02-10-2018	Male	right	10	5 à 10	30	7.5	Counter-Strike: Global Offensive		4	2	PC	Pub G		1	2	PC	League of Legend
Amateur	CVGP20	DB20	Included	Neuropsy only (travel restrictions)	0	19.0833	Français	Anglais	Canadienne	Francais	08-10-2018	Male	Left	5	5 à 7	28	6.5	Counter-Strike: Global Offensive		2	2	PC	Fortuite		4	3	PC	League of Legend	Gold V	2	2	PC

## Sheet: 3DMOT
Session	PVGP1	PVGP2	PVGP3	PVGP4	PVGP5	PVGP6	PVGP7	PVGP8	PVGP9	PVGP10	PVGP11	PVGP12	PVGP13	PVGP14	CVGP1	CVGP2	CVGP3	CVGP5	CVGP6	CVGP7	CVGP8	CVGP10	CVGP12	CVGP13	CVGP14	CVGP15	CVGP17
101	0.56	0.38	1.33	1.5	0.97	0.43	0.71	0.79	1.19	1.19	0.92	0.61	0.69	1.33	0.97	0.18	0.75	0.52	-	0.28	0.47	0.42	-	0.77	0.84	0.87	0.89		388
102	1.3	0.56	1.41	1.58	1.33	0.97	0.97	0.92	1.06	1.19	2.11	0.89	0.94	0.61	0.97	0.19	0.67	0.69	0.79	0.43	0.5	0.69	-	1.3	1.09	1.33	0.84		405
103	-	1.26	2	1.37	1.63	0.33	0.82	1.06	1.45	1.33	1.78	0.84	1.26	1.06	1.5	0.5	1.19	0.6	0.6	0.29	0.84	0.65	-	0.89	1.19	0.65	1.06		17
201	1.03	0.89	1.45	1.22	1.33	0.87	0.67	1.19	0.87	0.94	1.33	0.94	0.63	0.97	1.15	0.33	0.87	0.73	0.67	0.65	0.6	-	1.06	1.09	0.77	0.69	0.92
202	1.63	0.97	1.94	1.83	1.83	0.94	1.03	1.45	0.55	1.58	1.3	1.06	1.3	0.58	0.75	0.21	1.19	0.46	1.03	0.35	0.61	1.26	1.12	1.22	1.03	0.94	1.15
203	1.37	1	2.05	1.58	1.33	1.41	0.53	0.97	0.84	1.73	2.24	1.54	1.41	1.09	1.12	0.22	1.83	0.19	0.71	0.41	1.06	1.58	1.12	1.5	0.94	0.77	0.94
301	1.45	1	2.3	1.54	1.58	0.47	0.33	1.68	2.11	1.19	2.11	1.19	1.5	0.94	1	0.4	1.68	1.03	0.79	0.31	0.79	0.94	1.41	0.87	1.09	0.55	0.79
302	1.88	1.58	2.11	1.54	1.33	1.12	0.79	1.63	1.68	1.63	1.45	1.22	1.68	1.26	1.41	0.24	1.54	0.63	1.15	0.55	0.73	1.12	1.03	0.73	0.58	0.67	1.3
303	1.3	1.33	1.54	1.54	1.73	1.45	0.89	0.67	1.22	1.63	1.78	1.33	1.37	1.33	1.22	0.3	2	1.06	0.67	0.27	1.15	0.94	1.83	0.63	1.68	0.3	1.33
401	1.5	1.33	1.88	1.83	1.68	1.22	0.67	1.63	1.83	1.68	1.94	1.58	1.5	1.37	1.06	0.25	1.41	0.89	0.97	0.58	0.92	1.41	1.78	1.03	1.88	1.06	0.87
402	1.45	0.92	2	1.83	1.06	1.19	0.92	1.68	1.63	1.33	1.88	1.41	1.68	1.33	1.12	0.12	-	1.26	1.37	0.65	1.22	1.3	1.58	0.89	1.73	1.09	1.19
403	1.22	1.09	2.51	1.45	1.78	1.37	1.19	1.78	1.37	1.58	2.66	1.33	1.88	1.5	1.68	0.35	-	1.26	1.06	0.56	1.15	1.22	1.63	0.75	2.37	0.45	1.33
501	1.88	1.26	-	1.54	2.11	1.19	1.12	1.88	1.88	1.78	1.94	1.5	1.63	1.19	1.83	0.26	-	0.97	1.06	0.89	1.22	1	1.5	-	1.45	0.56	1.33
502	1.19	0.77	-	3.07	0.87	1.54	1.19	1.37	1.83	1.58	1.78	1.63	1.68	1.45	1.68	0.27	-	0.75	1.12	0.63	1.41	1.68	1.68	-	1.78	1.45	1
503	1.37	1.06	-	1.22	1.94	1.73	1.15	1.68	1.54	2.11	1.68	2.51	1.5	1.12	1.68	0.37	-	0.75	1.09	0.67	1.54	1.5	1.73	-	1.15	0.67	1.22

## Sheet: TABLE 3 info
COPY / PASTE FROM R- Analyses																			Professionel	Amateur
Measure	ns_AM	ns_PRO	mean_AM	mean_PRO	sd_AM	sd_PRO	diff	diff95%CIl	diff95%CIu	t	df	p	hG	hG_lb	hG_ub	hg CI			M (SD)	M (SD)	<-- for table 2
nMOTsessions	16	14	4.06	5	2.02	0	0.94	-0.14	2.01	1.86	15	0.083	0.62	-0.13	1.36	[-0,13 ,1,36]		nMOTsessions	5 (0)	4,06 (2,02)
Age	16	14	25.31	23.66	3.77	2.44	-1.65	-4.01	0.71	-1.44	25.9	0.162	-0.5	-1.24	0.24	[-1,24 ,0,24]		Age	23,66 (2,44)	25,31 (3,77)
Age_StartVGP	16	14	6.75	6.93	2.62	2.81	0.18	-1.87	2.23	0.18	26.8	0.859	0.06	-0.67	0.79	[-0,67 ,0,79]		Age_StartVGP	6,93 (2,81)	6,75 (2,62)
WeeklyVGP_now	16	14	9.47	55.79	3.48	16.72	46.32	36.55	56.08	10.18	14	0	3.86	2.63	5.09	[2,63 ,5,09]		WeeklyVGP_now	55,79 (16,72)	9,47 (3,48)
BDI	15	13	4.93	6.85	4.62	5.27	1.92	-1.98	5.81	1.01	24.1	0.321	0.38	-0.39	1.14	[-0,39 ,1,14]		BDI	6,85 (5,27)	4,93 (4,62)
																		Measure	Professionel	Amateur	Difference	Welch t-test	p-value	Effect size	<-- For Table 3
Measure	ns_AM	ns_PRO	mean_AM	mean_PRO	sd_AM	sd_PRO	diff	diff95%CIl	diff95%CIu	t	df	p	hG	hG_lb	hG_ub	hg CI			M (SD)	M (SD)	95% CI			Hedges' g
Coding	16	14	71	77.5	10.61	12.25	6.5	-2.16	15.16	1.54	26	0.135	0.55	-0.19	1.3	[-0,19 ,1,3]		Coding	77,5 (12,25)	71 (10,61)	6,5 [-2,16, 15,16]	t(26) = 1,54	0.135	0,55 [-0,19 ,1,3]
Stroop_CN	16	12	26.75	24.5	3.73	4.01	-2.25	-5.33	0.83	-1.51	22.9	0.144	-0.57	-1.34	0.21	[-1,34 ,0,21]		Stroop_CN	24,5 (4,01)	26,75 (3,73)	-2,25 [-5,33, 0,83]	t(22,9) = -1,51	0.144	-0,57 [-1,34 ,0,21]
Stroop_WR	16	12	20	17.42	3.03	1.56	-2.58	-4.41	-0.76	-2.93	23.5	0.007	-1	-1.8	-0.19	[-1,8 ,-0,19]		Stroop_WR	17,42 (1,56)	20 (3,03)	-2,58 [-4,41, -0,76]	t(23,5) = -2,93	0.007	-1 [-1,8 ,-0,19]
Stroop_Inh	16	12	45.94	43.67	7.35	5.58	-2.27	-7.3	2.75	-0.93	26	0.361	-0.33	-1.1	0.44	[-1,1 ,0,44]		Stroop_Inh	43,67 (5,58)	45,94 (7,35)	-2,27 [-7,3, 2,75]	t(26) = -0,93	0.361	-0,33 [-1,1 ,0,44]
Stroop_Flex	16	12	52.25	51.42	5.7	6.97	-0.83	-5.96	4.3	-0.34	20.9	0.739	-0.13	-0.89	0.63	[-0,89 ,0,63]		Stroop_Flex	51,42 (6,97)	52,25 (5,7)	-0,83 [-5,96, 4,3]	t(20,9) = -0,34	0.739	-0,13 [-0,89 ,0,63]
Stroop_InhErr	16	12	1.5	0.75	1.51	0.75	-0.75	-1.65	0.15	-1.73	23.2	0.098	-0.59	-1.36	0.19	[-1,36 ,0,19]		Stroop_InhErr	0,75 (0,75)	1,5 (1,51)	-0,75 [-1,65, 0,15]	t(23,2) = -1,73	0.098	-0,59 [-1,36 ,0,19]
Stroop_FlexErr	16	12	1.25	1.33	1	1.44	0.08	-0.93	1.1	0.17	18.7	0.865	0.07	-0.7	0.83	[-0,7 ,0,83]		Stroop_FlexErr	1,33 (1,44)	1,25 (1)	0,08 [-0,93, 1,1]	t(18,7) = 0,17	0.865	0,07 [-0,7 ,0,83]
VisPuzzles	16	14	19.5	18.5	3.01	3.88	-1	-3.64	1.64	-0.78	24.4	0.442	-0.28	-1.02	0.45	[-1,02 ,0,45]		VisPuzzles	18,5 (3,88)	19,5 (3,01)	-1 [-3,64, 1,64]	t(24,4) = -0,78	0.442	-0,28 [-1,02 ,0,45]
Tower_Total	16	13	18.44	20.15	4.32	4.32	1.71	-1.6	5.03	1.06	25.8	0.297	0.39	-0.37	1.14	[-0,37 ,1,14]		Tower_Total	20,15 (4,32)	18,44 (4,32)	1,71 [-1,6, 5,03]	t(25,8) = 1,06	0.297	0,39 [-0,37 ,1,14]
Tower_Ratio	16	13	2	1.49	1.04	0.29	-0.51	-1.08	0.06	-1.86	17.9	0.079	-0.62	-1.38	0.15	[-1,38 ,0,15]		Tower_Ratio	1,49 (0,29)	2 (1,04)	-0,51 [-1,08, 0,06]	t(17,9) = -1,86	0.079	-0,62 [-1,38 ,0,15]
DigitSpan_Total	16	12	28.25	32.75	5.17	5.5	4.5	0.27	8.73	2.2	23	0.038	0.82	0.03	1.62	[0,03 ,1,62]		DigitSpan_Total	32,75 (5,5)	28,25 (5,17)	4,5 [0,27, 8,73]	t(23) = 2,2	0.038	0,82 [0,03 ,1,62]
DigitSpan_FW	16	12	9.75	11.67	2.52	2.46	1.92	-0.04	3.88	2.02	24.1	0.055	0.75	-0.04	1.53	[-0,04 ,1,53]		DigitSpan_FW	11,67 (2,46)	9,75 (2,52)	1,92 [-0,04, 3,88]	t(24,1) = 2,02	0.055	0,75 [-0,04 ,1,53]
DigitSpan_BW	16	12	8.69	10.25	2.09	2.7	1.56	-0.39	3.52	1.67	20.1	0.111	0.64	-0.14	1.42	[-0,14 ,1,42]		DigitSpan_BW	10,25 (2,7)	8,69 (2,09)	1,56 [-0,39, 3,52]	t(20,1) = 1,67	0.111	0,64 [-0,14 ,1,42]
DigitSpan_Seq	16	12	9.81	10.83	1.56	1.8	1.02	-0.33	2.37	1.57	21.8	0.13	0.6	-0.18	1.37	[-0,18 ,1,37]		DigitSpan_Seq	10,83 (1,8)	9,81 (1,56)	1,02 [-0,33, 2,37]	t(21,8) = 1,57	0.13	0,6 [-0,18 ,1,37]
SpatSpan_Total	16	14	19.5	23	2.45	2.94	3.5	1.45	5.55	3.52	25.5	0.002	1.27	0.47	2.07	[0,47 ,2,07]		SpatSpan_Total	23 (2,94)	19,5 (2,45)	3,5 [1,45, 5,55]	t(25,5) = 3,52	0.002	1,27 [0,47 ,2,07]
SpatSpan_FW	16	14	10.19	12.43	1.68	1.5	2.24	1.05	3.43	3.85	28	0.001	1.36	0.55	2.17	[0,55 ,2,17]		SpatSpan_FW	12,43 (1,5)	10,19 (1,68)	2,24 [1,05, 3,43]	t(28) = 3,85	0.001	1,36 [0,55 ,2,17]
SpatSpan_BW	16	14	9.31	10.57	1.54	1.99	1.26	-0.09	2.61	1.92	24.4	0.067	0.7	-0.06	1.45	[-0,06 ,1,45]		SpatSpan_BW	10,57 (1,99)	9,31 (1,54)	1,26 [-0,09, 2,61]	t(24,4) = 1,92	0.067	0,7 [-0,06 ,1,45]
D2_TN	16	14	493.56	546.29	63.49	56.14	52.73	7.98	97.47	2.41	28	0.023	0.85	0.09	1.61	[0,09 ,1,61]		D2_TN	546,29 (56,14)	493,56 (63,49)	52,73 [7,98, 97,47]	t(28) = 2,41	0.023	0,85 [0,09 ,1,61]
D2_PE	16	14	3.66	4.41	2.91	2.98	0.75	-1.46	2.96	0.7	27.3	0.492	0.25	-0.48	0.98	[-0,48 ,0,98]		D2_PE	4,41 (2,98)	3,66 (2,91)	0,75 [-1,46, 2,96]	t(27,3) = 0,7	0.492	0,25 [-0,48 ,0,98]
D2_NC	16	14	474.94	521.86	59.31	52.48	46.92	5.11	88.73	2.3	28	0.029	0.81	0.05	1.57	[0,05 ,1,57]		D2_NC	521,86 (52,48)	474,94 (59,31)	46,92 [5,11, 88,73]	t(28) = 2,3	0.029	0,81 [0,05 ,1,57]
D2_CP	16	14	194.38	208.79	28.41	31.62	14.41	-8.26	37.08	1.31	26.4	0.203	0.47	-0.27	1.21	[-0,27 ,1,21]		D2_CP	208,79 (31,62)	194,38 (28,41)	14,41 [-8,26, 37,08]	t(26,4) = 1,31	0.203	0,47 [-0,27 ,1,21]
D2_FR	16	14	13.75	11	3.84	3.21	-2.75	-5.39	-0.11	-2.14	28	0.042	-0.75	-1.51	0	[-1,51 ,0]		D2_FR	11 (3,21)	13,75 (3,84)	-2,75 [-5,39, -0,11]	t(28) = -2,14	0.042	-0,75 [-1,51 ,0]
GroPeg_DH	16	14	64.1	69.73	10.68	11.26	5.63	-2.62	13.89	1.4	27	0.173	0.5	-0.24	1.24	[-0,24 ,1,24]		GroPeg_DH	69,73 (11,26)	64,1 (10,68)	5,63 [-2,62, 13,89]	t(27) = 1,4	0.173	0,5 [-0,24 ,1,24]
GroPeg_NDH	16	14	66.12	71.58	9.65	13.95	5.46	-3.73	14.66	1.23	22.7	0.231	0.45	-0.29	1.19	[-0,29 ,1,19]		GroPeg_NDH	71,58 (13,95)	66,12 (9,65)	5,46 [-3,73, 14,66]	t(22,7) = 1,23	0.231	0,45 [-0,29 ,1,19]

## Sheet: TABLE 1 info
Inclusion	(Multiple Items)
	Column Labels					Amateur	Professionel
Values	Amateur	Professional	Grand Total			M (SD)	M (SD)	<-- for table 2
Average of Age	25.3125	23.6607	24.5417		nMOTsessions	4.06 (2.02)	5 (0)	<-- maybe don’t need
Average of Age_StartVGP	6.75	6.92857	6.83333		Age	25.31 (3.77)	23.66 (2.44)
Average of WeeklyVGP_now	9.46875	55.7857	31.0833		Age_StartVGP	6.75 (2.62)	6.93 (2.81)
					WeeklyVGP_now	9.47 (3.48)	55.79 (16.72)
					BDI	4.93 (4.62)	6.85 (5.27)
Inclusion	(Multiple Items)
	Column Labels
	Amateur		Amateur Total	Professional	Professional Total	Grand Total
Row Labels	Left	Right		Right
Count of Gender
Female	1	3	4			4
Male	2	10	12	14	14	26
Count of Handedness
Female	1	3	4			4
Male	2	10	12	14	14	26
Total Count of Gender	3	13	16	14	14	30
Total Count of Handedness	3	13	16	14	14	30

## Sheet: Glossary
Term	Definition	Calculation	Complément d'information
Coding-raw	Digit symbol coding task consists of nine digit-symbol pairs followed by a list of digits. Under each digit the subject should write down the corresponding symbol as fast as possible. The score reflects the number of correct symbols trenslated in 120 seconds. Maximum 135 points	The points are calculated from the number of good answer minus the number of errors.
Stroop-ColorNaming	Time in which participants compleated the first condition of the stroop task. The first condition consists in naming squares of color.	Time in seconds
Stroop-WordReading	Time in which participants compleated the second condition of the stroop task. The second condition consists in reading color names in black font.	Time in seconds
Stroop-Inhibition	Time in which participants compleated the third condition of the stroop task. The thrid condition consists in naming the color ink rather than reading the color name. It mesure inhibition.	Time in seconds
Stroop-Flexibility	Time in which participants compleated the fourth condition of the stroop task. The fourth condition consists in alterning between naming the color ink (rather than reading the color name), and reading the colors name (rather than the ink color) when the world are framed. It mesure mental flexibility.	Time in seconds
Stroop-Erreurs-inhibition	Total number of wrong answer (both not corrected and auto-corrected) that the participant committed in the third condition of the stroop task.	Number of wrong answer	Cette mesure à surtout été complété pour pernettre un contrôle de la validité des autre mesure du Stroop. Dans la mesure où si un participant réalise la tâche très rapidement, mais qu'il commet un nombre très élèver d'erreurs, nous aurions considérer son résultat comme non-valide, ce qui ne s'est pas avéré. Deplus, les moyenne sont très similaire entre les groupes.
Stroop-Erreur-Flexibility	Total number of wrong answer (both not corrected and auto-corrected) that the participant committed in the fourth condition of the stroop task.	Number of wrong answer
VisuelPuzzels-Raw	Number of puzzles correctely completed in 30 seconds. It mesure mental manipulation and visuospatial rotation skills. Maximum 26 points.	One point per good answer.
Tower-Raw	For each construction, the participant could get 0, 1, 2, 3 ou 4 points (according to the number of deplacement needed to reproduce the model). The score reflect the sum of those points. Maximum 30 points
Tower-RatioAcuracy	The move accuracy ratio represents the degree to which examinees make more moves than necessary.	the number of moves used by the examinee to solve the problem divided by the minimum number of moves necessary
DigitSpan-Total	Digit Span it a task composed from 3 substests ; digit span foward, digit span backward and digit span sequancing. The total score is the sum of the points obtained in the three substests. Maximum 48 points.	One point per good answer.
DigitSpan-Foward	The number of correctly repeated sequence of numbers in direct order. Maximu 16 points	One point per good answer.
DigitSpan-Backward	The number of correctly repeated sequence of numbers in indirect order. Maximum 16 points	One point per good answer.
DigitSpan-Sequancing	The number of correctly repeated sequence of numbers in ascending order. Maximum 16 points	One point per good answer.
SpatianSpan-Total	The sum of sequances correctly reproducted for the direct order and the indirect order. Maximum 32 points.	One point per good answer.
SpatialSpan-Foward	One point per sequance correctly reproduced. Each sequance consist in taping the blocs in the same order than the examiner did. Maximum 16 points	One point per good answer.
SpatialSpan-Backward	One point per sequance correctly reproduced. Each sequance consist in taping the blocs in the inverse order than the examiner did. Maximum 16 points	One point per good answer.
D2(TN)	Total nomber of items processed, both targets and distractors. Maximum of 658 items.	One per stimuli processed.
D2(E%)	Percentage of errors representif the proportion of error made within the total of item processed.	Calculated by dividing the number of errors by the number of items processed.
D2(TN-E)	The number of items scanned minus errors scores (both omission and comissions). It mesure the quantity of work compleated a simgle correction of error.	Number of processed items minus errors.
D2(CP)	The score represent the concentration performance. It is driven from the number of correctly crossed out relevent items minus the errors of comissions.	Number of correctly crossed out items, minus comissions.
D2(FR)	The score represents the fluctuation rate. It asseses the stability and consistancy of performance acriss the task.	The differance between the line with a maximum and a minimum of items processed.
Grooved-Dominant	Time to place all the pegs within the randomly positionned slots with the dominant hand.	Time in seconds
Grooved-Non-Dominant	Time to place all the pegs within the randomly positionned slots with the non-dominant hand.	Time in seconds
Stroop-Inhibition-VS-ColorNaming	Scaled score allowing to isolate inhibition score from the color naming condition.	Inhibition scaled score minus the color naming scaled score.
Stroop-Flexibility-VS-Combined	Scaled score allowing to isolate flexibility score from the first two conditions (color naming and reading). The combined score is obtained by adding the color naming condition scaled score to the word reading condition scaled score.	Flexibility scaled score minus combined scaled score
Stroop-Flexibility-VS-Inhibition	To isolate the flexiblity scaled score from the inhibition	Flexibility scaled score minus inhibition scaled score

## Sheet: 3DMOT stats
Type III Analysis of Variance Table with Kenward-Roger's method
Sum Sq Mean Sq NumDF DenDF F value Pr(>F)
Group 0.4466 0.4466 1 24.783 5.5434 0.02679 *
log(blockID) 6.2016 6.2016 1 24.785 76.9780 4.512e-09 ***
Group:log(blockID) 0.0990 0.0990 1 24.785 1.2285 0.27834
---
Signif. codes: 0 ‘***’ 0.001 ‘**’ 0.01 ‘*’ 0.05 ‘.’ 0.1 ‘ ’ 1
speed ~ Group * log(blockID) + (1 + log(blockID) | subjID)
Linear mixed model fit by REML. t-tests use Kenward-Roger's method ['lmerModLmerTest']
Formula: speed ~ Group * log(blockID) + (1 + log(blockID) | subjID)
Data: motLearn
REML criterion at convergence: 225.4
Scaled residuals:
Min 1Q Median 3Q Max
-2.8471 -0.5738 -0.0108 0.5958 4.4013
Random effects:
Groups Name Variance Std.Dev. Corr
subjID (Intercept) 0.054733 0.23395
log(blockID) 0.009745 0.09872 0.06
Residual 0.080564 0.28384
Number of obs: 388, groups: subjID, 27
Fixed effects:
Estimate Std. Error df t value Pr(>|t|)
(Intercept) 0.59033 0.08779 25.75139 6.725 4.10e-07 ***
GroupProfessional 0.28223 0.11987 24.78332 2.354 0.0268 *
log(blockID) 0.21057 0.04039 26.10740 5.214 1.89e-05 ***
GroupProfessional:log(blockID) 0.06089 0.05494 24.78528 1.108 0.2783
